# Supplementary material
Source: PubMed Central journal article supplement (PMC2808372)

# FIGURE S1

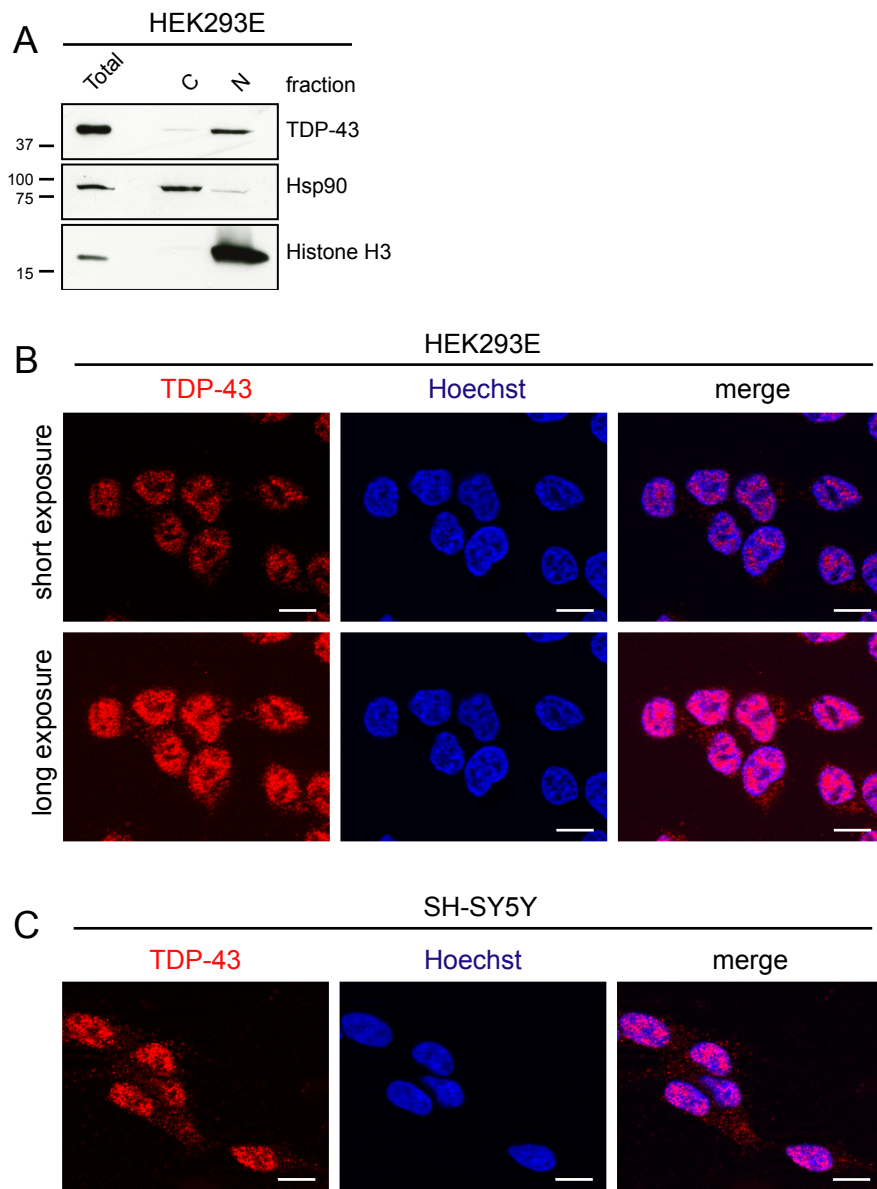

Supplement: emboj2009324s1.pdf [file emboj2009324s1.pdf]

**FIGURE S2**

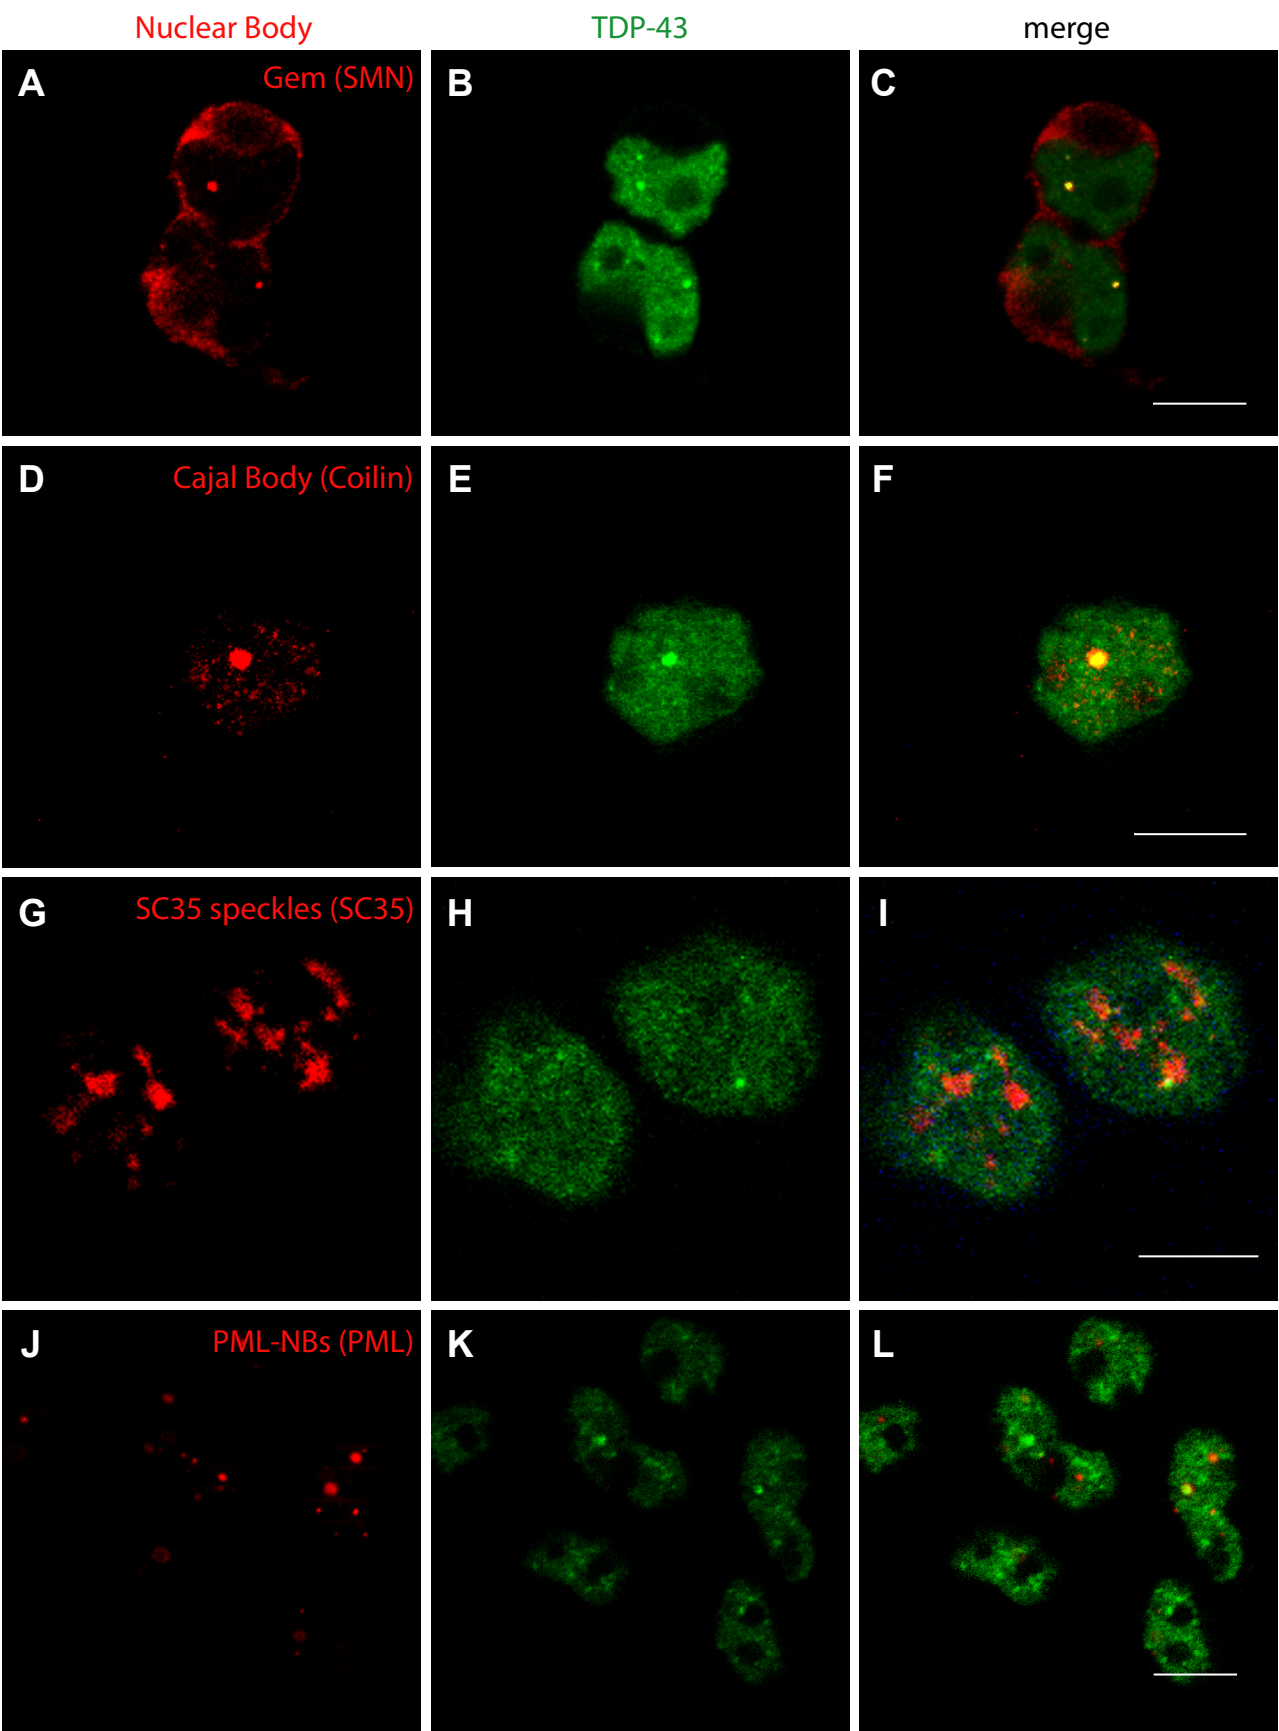

Supplement: emboj2009324s2.pdf [file emboj2009324s2.pdf]

**FIGURE S3**

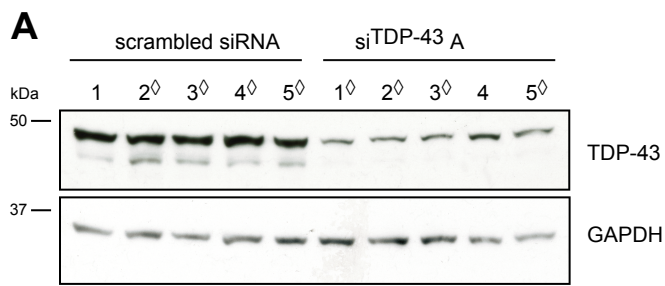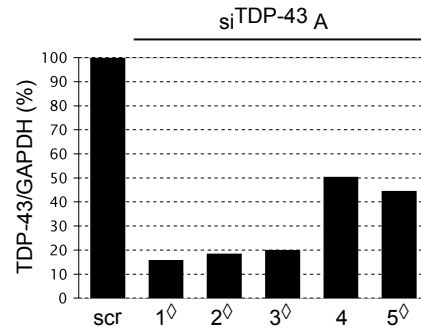

Supplement: emboj2009324s4.pdf [file emboj2009324s4.pdf]

# FIGURE S4

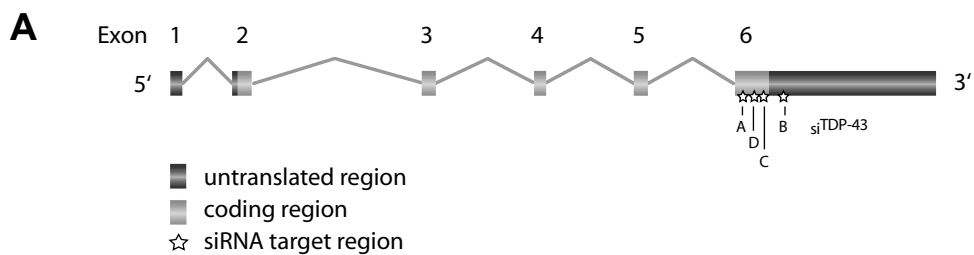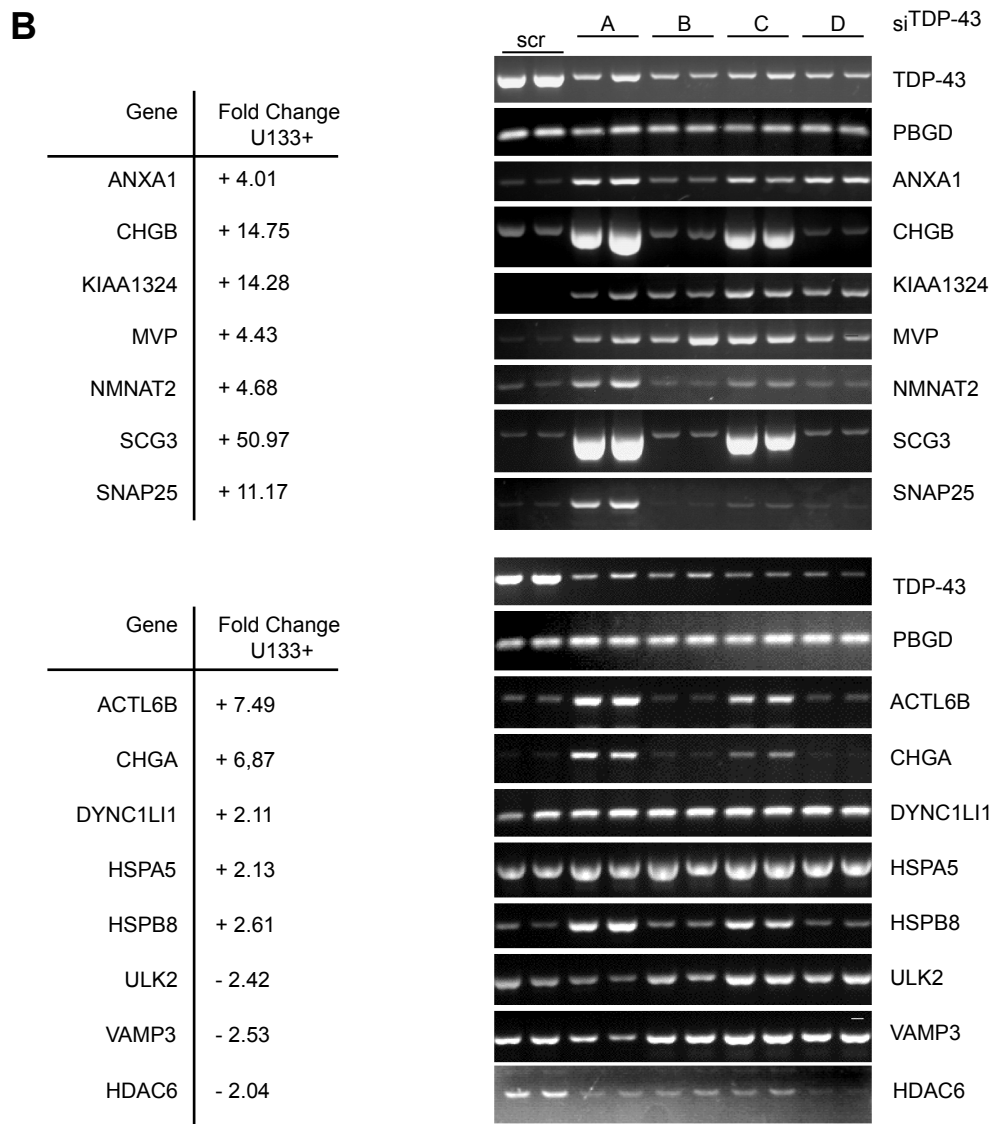

Supplement: emboj2009324s5.pdf [file emboj2009324s5.pdf]
